# Supplementary material for: Carrier dynamics at trench defects in InGaN/GaN quantum wells revealed by time-resolved cathodoluminescence
Source: Royal Society of Chemistry journal article supplement (doi:10.1039/d1nr06088k), 2021-12-14
Supplement: d1nr06088k1.pdf [file d1nr06088k1.pdf]

# Carrier dynamics at trench defects in InGaN/GaN quantum wells revealed by time-resolved cathodoluminescence

G. Kusch<sup>1</sup>, E.J. Comish<sup>1</sup>, K. Loeto<sup>1</sup>, S. Hammersley<sup>2,3</sup>, M.J. Kappers<sup>1</sup>, P. Dawson<sup>1‡</sup>, R.A. Oliver<sup>1</sup>, F.C-P. Massabuau<sup>1,4\*</sup>

<sup>1</sup> Department of Materials Science and Metallurgy, University of Cambridge, Cambridge CB3 0FS, UK

<sup>2</sup> Photon Science Institute, Department of Electrical and Electronic Engineering, School of Engineering, The University of Manchester, Manchester, M13 9PL, UK

<sup>3</sup> Poro Technologies Ltd, Sawston, CB22 3JH, UK

<sup>4</sup> Department of Physics, SUPA, University of Strathclyde, Glasgow G4 0NG, UK

\* Email: [f.massabuau@strath.ac.uk](mailto:f.massabuau@strath.ac.uk)

‡ Deceased

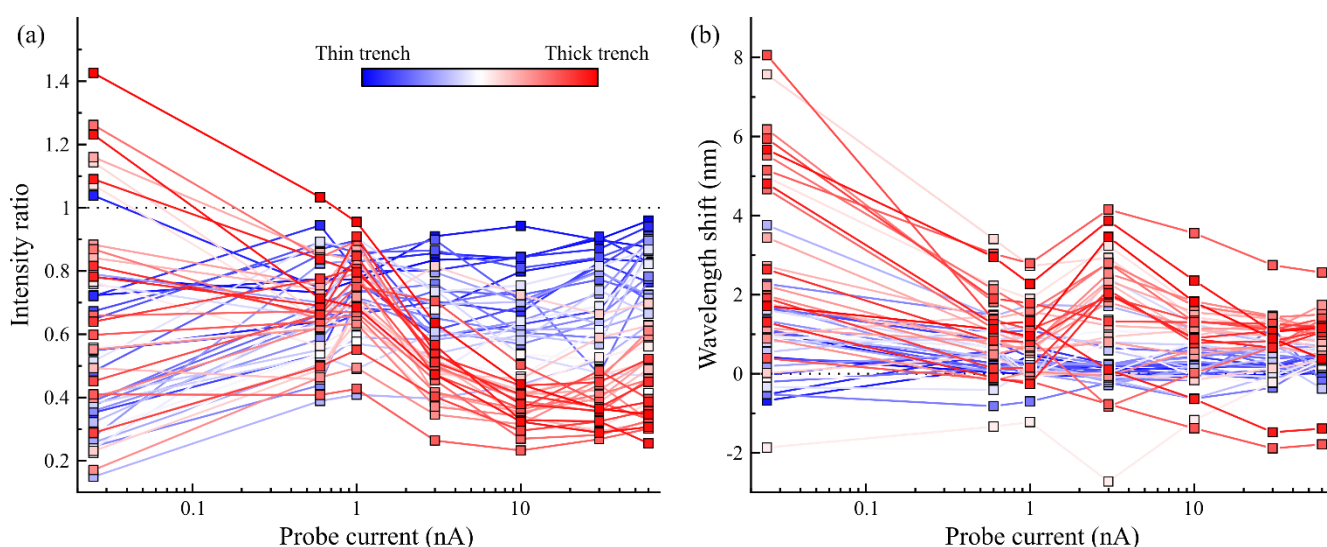

**Figure S1.** Plots of the (a) peak intensity ratio and (b) wavelength shift (>0 means redshifted emission) versus probe current for the 50 trench defects analysed, and color-coded with respect to the trench thickness.

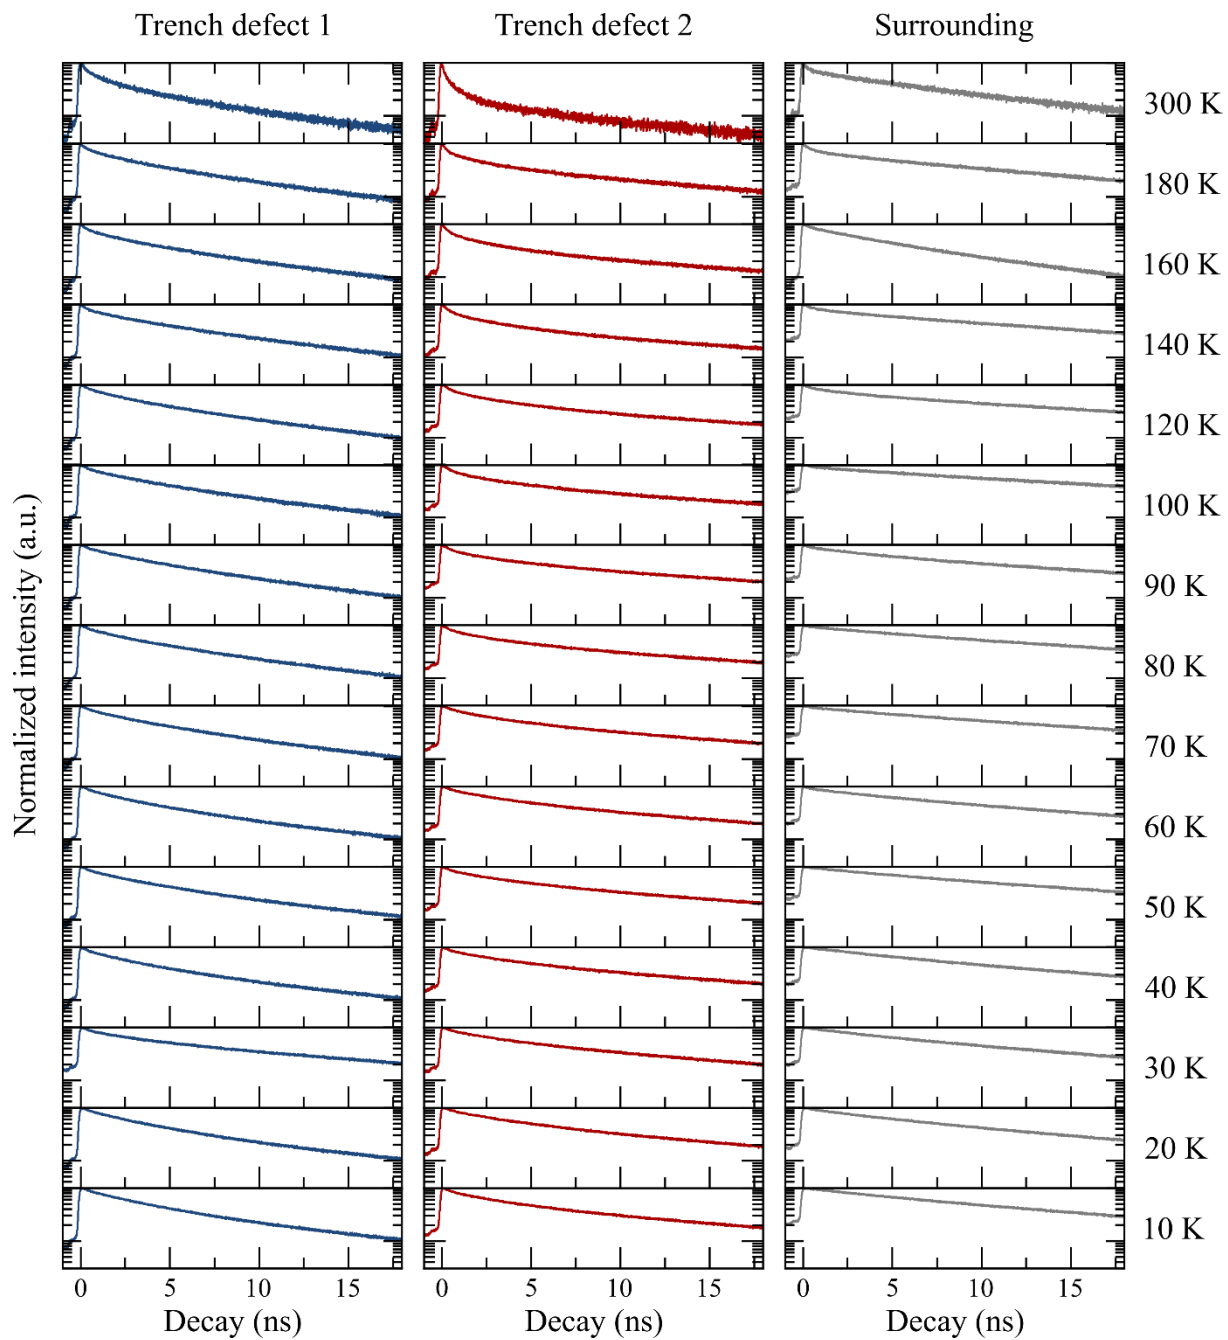

**Figure S2.** Time decay curves taken at the peak emission of trench defect 1 (left), trench defect 2 (middle) and surrounding material at temperatures from 10 K to 300 K.
